# Supplementary material for: Photofragmentation mechanisms in protonated chiral cinchona alkaloids
Source: Royal Society of Chemistry journal article supplement (doi:10.1039/c6cp04041a), 2016-01-01
Supplement: c6cp04041a1.pdf [file c6cp04041a1.pdf]

# **Photofragmentation Mechanisms in Protonated Chiral Cinchona Alkaloids**

Sunil Kumar,<sup>a</sup> Bruno Lucas,<sup>a</sup> Jacqueline Fayeton,<sup>a</sup> Debora Scuderi,<sup>b</sup> Ivan Alata,<sup>a</sup> Michel Broquier,<sup>a</sup> Katia Le Barbu-Debus,<sup>a</sup> Valeria Lepère,<sup>a</sup> Anne Zehnacker<sup>\*a</sup>

*a) a Institut des Sciences Moléculaires d'Orsay (ISMO), CNRS, Univ. Paris-Sud, Université Paris-Saclay, F-91405 Orsay (France)*

*b) Univ. Paris-Sud, Laboratoire de Chimie Physique, UMR8000, and CNRS, Orsay, F-91405 France*

\*e-mail [anne.zehnacker-rentien@u-psud.fr](mailto:anne.zehnacker-rentien@u-psud.fr)

## **Supplementary Information**

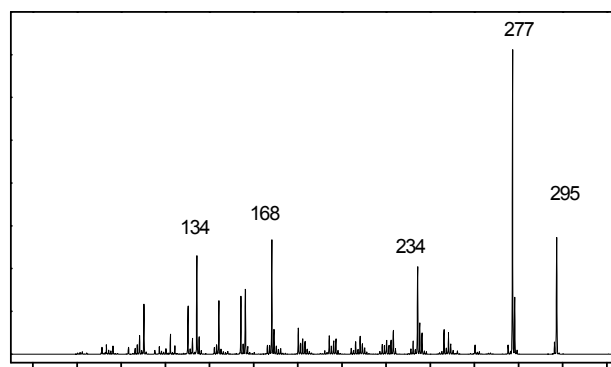

**Figure S1:** CID-MS<sup>2</sup> mass spectrum of CdH<sup>+</sup>

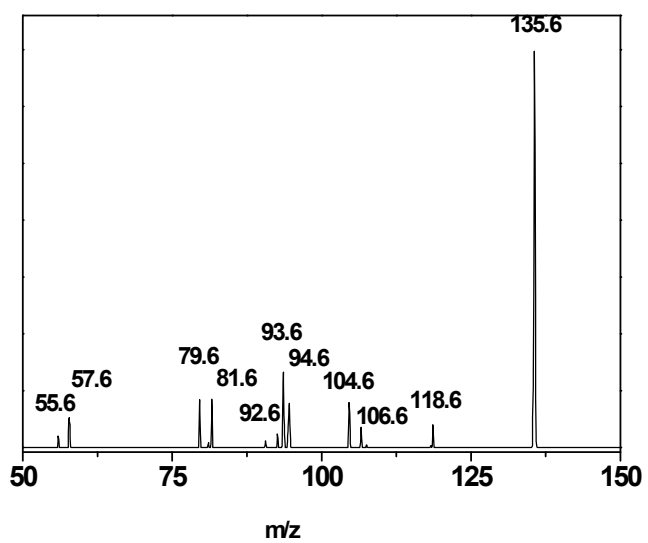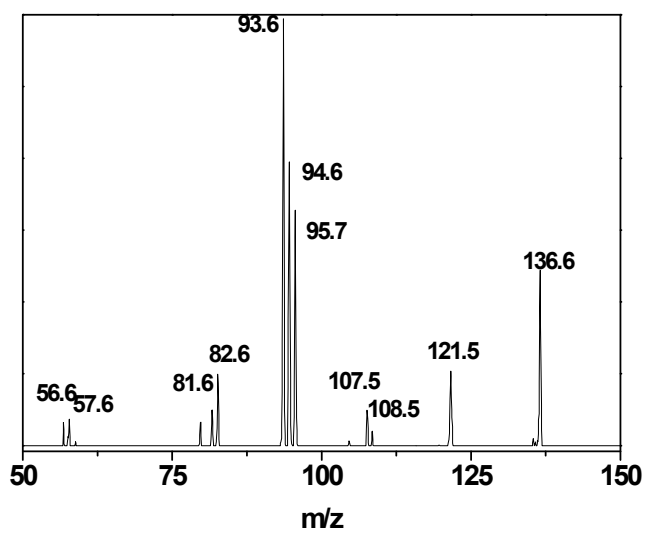

Figure S2: CID-MS<sup>3</sup> fragmentation mass spectra of photoproducts at  $m/z$  136 (top) and  $m/z$  137 (bottom). The spectra have been normalized at the most intense peak.

**Table S1:** Experimental vibrational frequencies for ions at  $m/z$  136 and 137. Unscaled harmonic frequencies of the lowest energy calculated isomers, determined at the b3lyp/6-31++g(d,p) level of theory, and band assignments. The reported calculated intensities given in parentheses are in km/mol.

| $(m/z$ 136)                                 |                                                               |                                                | $(m/z$ 137)                                 |                                                               |                                                          |
|---------------------------------------------|---------------------------------------------------------------|------------------------------------------------|---------------------------------------------|---------------------------------------------------------------|----------------------------------------------------------|
| Experimental frequency ( $\text{cm}^{-1}$ ) | Calculated frequency ( $\text{cm}^{-1}$ )                     | Assignment                                     | Experimental frequency ( $\text{cm}^{-1}$ ) | Calculated frequency ( $\text{cm}^{-1}$ )                     | Assignment                                               |
| -                                           | 974 (29)<br>989 (39)                                          | C=CH <sub>2</sub> wag                          | 960                                         | 996 (56)<br>1015 (20)                                         | Coupled CH bend, CH <sub>2</sub> and CH <sub>3</sub> wag |
| -                                           | 1204                                                          | CH and CH <sub>2</sub> bend                    | 1215                                        | 1194 (32)<br>1204 (35)                                        | Coupled CH and CH <sub>2</sub> bend                      |
| -                                           | 1352 (15)<br>1391 (18)                                        | Coupled CH <sub>2</sub> scissoring and CH bend | 1315                                        | 1285 (15)                                                     | Coupled CH <sub>2</sub> scissoring and CH bend           |
| -                                           | 1470 (28)                                                     | CH <sub>2</sub> scissoring                     | 1395                                        | 1415 (26)                                                     | CH <sub>2</sub> bend                                     |
| 1440                                        | 1522 (22)<br>1492 (15)<br>1470 (29)<br>1425 (35)<br>1412 (26) | NH bend<br><br>CH <sub>2</sub> scissoring      | 1440                                        | 1475 (10)<br>1482 (10)<br>1493 (19)<br>1496 (20)<br>1415 (25) | CH and CH <sub>2</sub> scissoring                        |
| 1630                                        | 1714 (89)                                                     | Ring deformation                               | 1690                                        | 1731 (5)                                                      | C=C stretch                                              |

**Table S2** Structural parameters and relative energies of the most stable isomers of CdH<sup>+</sup> at the ri-cc2/aug-ccpVDZ level.

| CdH <sup>+</sup>    | $\tau_1$ | $\tau_2$ | $\tau_3$ | T3   | $\Delta E_0(\text{kcal/mol})$ |
|---------------------|----------|----------|----------|------|-------------------------------|
| $\gamma$ -open(10)  | 97       | -80      | 48       | 171  | 0.0                           |
| $\gamma$ -open(3)   | 98       | 168      | -63      | -176 | 1.0                           |
| $\gamma$ -closed(1) | -111     | 48       | 175      | 177  | 1.1                           |
| $\gamma$ -closed(2) | 68       | 49       | 173      | 178  | 1.5                           |
